# Supplementary material
Source: publisher figshare collection journal article supplement (https://acs.figshare.com/ndownloader/files/5457002)
Supplement: Supplementary file 1 [file 5457002]

Supporting Information

**Optically Active Helical Polyacetylene Bearing Ferrocenyl Amino-Acid  
Derivative in Pendants. Preparation and Application as Chiral Organocatalyst  
for Asymmetric Aldol Reaction**

Jinrui Deng,<sup>1,2</sup> Biao Zhao,<sup>1,2</sup> Jianping Deng<sup>1,2\*</sup>

<sup>1</sup>State Key Laboratory of Chemical Resource Engineering, Beijing University of  
Chemical Technology, Beijing 100029, China

<sup>2</sup>College of Materials Science and Engineering, Beijing University of Chemical  
Technology, Beijing 100029, China

E-mail: dengjp@mail.buct.edu.cn

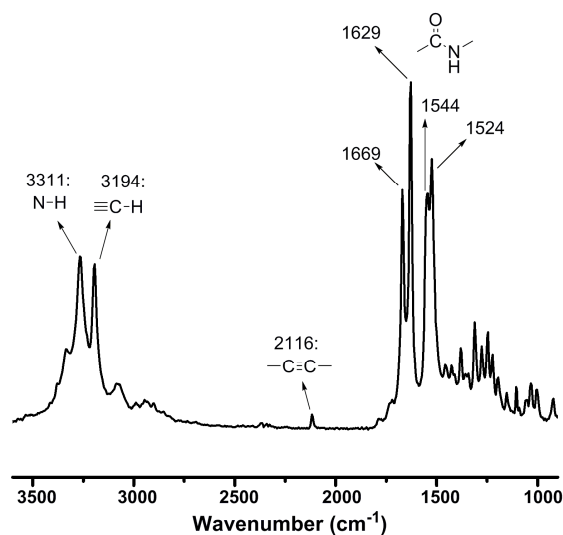

**Figure S1.** FT-IR spectrum of chiral monomer **L-MAFc** (in KBr tablet).

IR (KBr): 3311 (N-H), 3194 (H-C≡C), 2116 (C≡C), 1669, 1544 (CONH), 1629, 1524 (CONH)  $\text{cm}^{-1}$ .

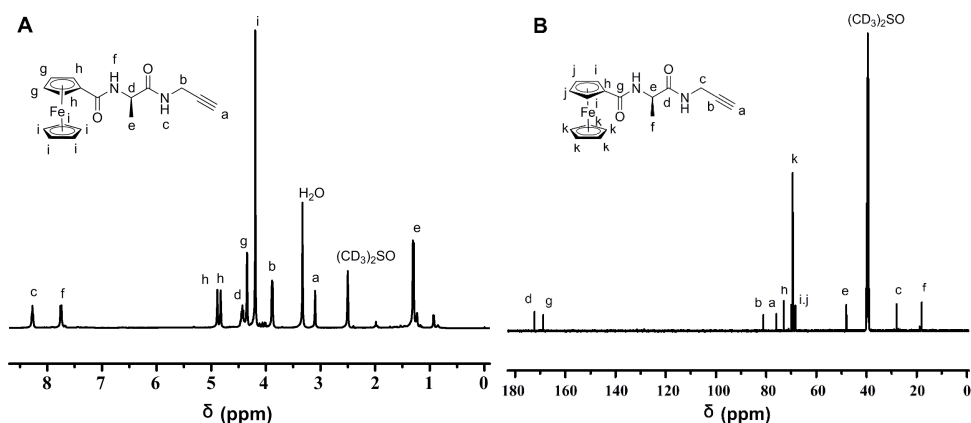

**Figure S2.** (A)  $^1\text{H}$  and (B)  $^{13}\text{C}$  NMR spectra of **L-MAFc**; measured in DMSO at 25 °C.

$^1\text{H}$  NMR ( $[\text{D}_6]$ DMSO)  $\delta$ =8.28 (d,  $J$  = 4.9 Hz, 1H; NH), 7.75 (d,  $J$  = 7.8 Hz, 1H; NH), 4.89 (s, 1H; H-2, Fc), 4.83 (s, 1H; H-5, Fc), 4.43 (dt,  $J$  = 14.7, 7.2 Hz, 1H; CH), 4.34 (s, 2H; H-3, H-4, Fc), 4.19 (s, 5H,  $\text{Cp}_{\text{unsubst.}}$ ), 3.88 (dd,  $J$  = 5.2, 2.2 Hz, 2H;  $\text{CHCCH}_2$ -), 3.10 (s, 1H;  $\text{CHCCH}_2$ -), 1.30 (d,  $J$  = 7.2 Hz, 3H;  $\text{CH}_3$ -).  $^{13}\text{C}$  NMR ( $[\text{D}_6]$ DMSO)  $\delta$ =172.3 (CONH), 168.8 (COFc), 81.1 (CHC-), 75.9 (CHC-), 73.0 (C-1, Fc), 69.9 ( $\text{Cp}_{\text{unsubst.}}$ ), 69.4 (C-2, C-5, Fc), 68.3 (C-3, C-4, Fc), 48.0 ( $\text{CH}_3\text{CH}$ ), 28.02 ( $\text{CHCCH}_2$ -), 18.0 ( $\text{CH}_3\text{CH}$ ).

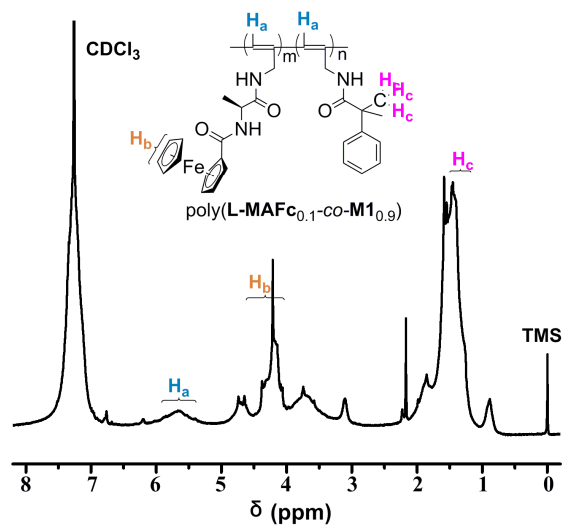

**Figure S3.** <sup>1</sup>H NMR spectrum of poly(L-MAFc<sub>0.1</sub>-co-M1<sub>0.9</sub>); measured in CDCl<sub>3</sub> at 25 °C.

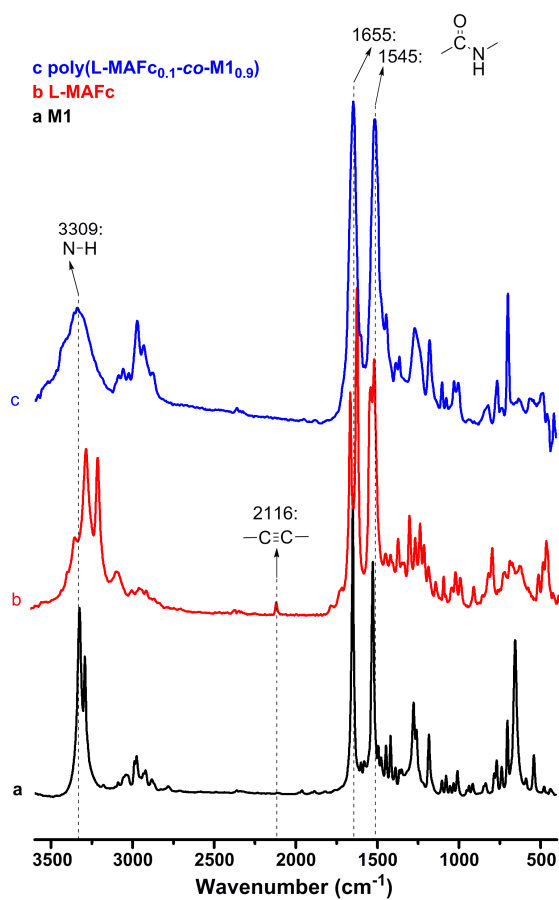

**Figure S4.** Typical FT-IR spectra of (a) M1, (b) L-MAFc and (c) poly(L-MAFc<sub>0.1</sub>-co-M1<sub>0.9</sub>) (in KBr tablet).

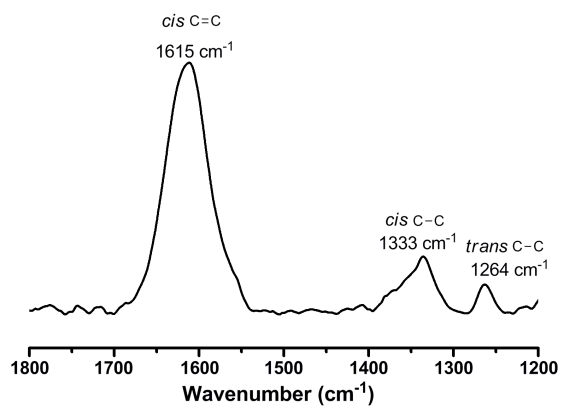

**Figure S5.** Typical Raman spectrum of poly(**L-MAFc<sub>0.1</sub>-co-M1<sub>0.9</sub>**).

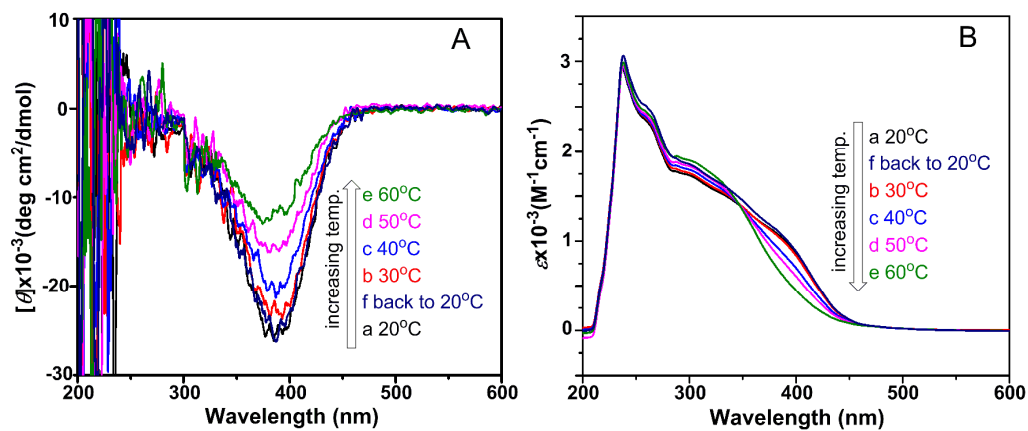

**Figure S6.** (A) CD and (B) UV-vis spectra of poly(**D-MAFc<sub>0.1</sub>-co-M1<sub>0.9</sub>**) at increasing temperatures (from 20 to 60 °C) in THF ( $c = 1 \times 10^{-3}$  mol/L).

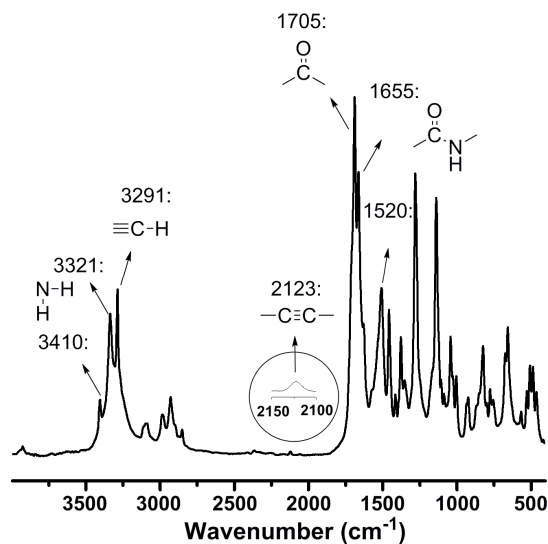

**Figure S7.** FT-IR spectrum of chiral monomer **L-MTFc** (in KBr tablet).

IR (KBr): 3410 (N-H free), 3321 (N-H assoc.), 3291 (H-C≡C), 2123 (C≡C), 1705 (C=O), 1655, 1520 (CONH)  $\text{cm}^{-1}$ .

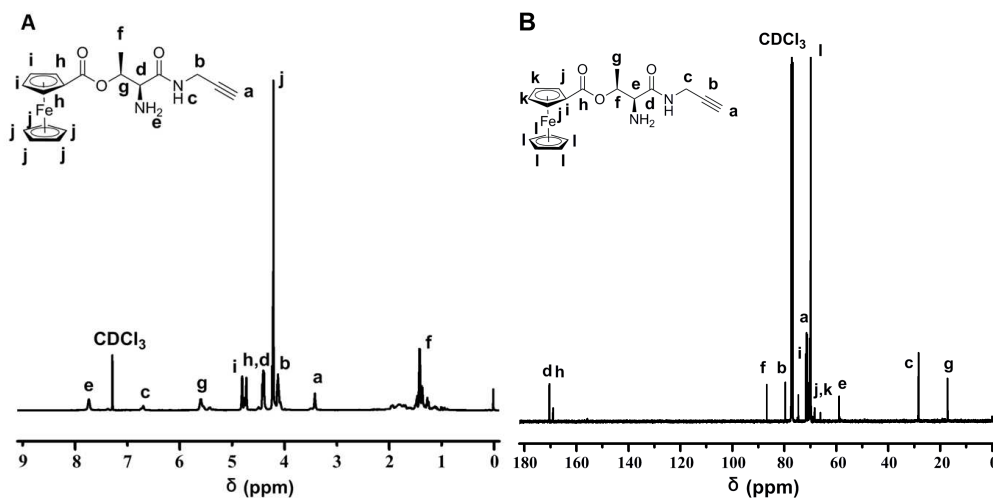

**Figure S8.** (A)  $^1\text{H}$  and (B)  $^{13}\text{C}$  NMR spectra of **L-MTFc**; measured in  $\text{CDCl}_3$  at  $25^\circ\text{C}$ .

$^1\text{H}$  NMR ( $\text{CDCl}_3$ )  $\delta$ =7.74 (s, 2H;  $\text{NH}_2$ ), 6.70 (s, 1H; CONH), 5.58 (t,  $J$  = 11.3 Hz, 1H;  $\text{CH}_3\text{CH}$ -), 4.81 (s, 2H; H-2, H-5, Fc), 4.73 (s, 2H; H-3, H-4, Fc), 4.41 (dt,  $J$  = 7.2, 3.8 Hz, 1H; CH), 4.21 (s, 5H;  $\text{Cp}_{\text{unsubst.}}$ ), 4.10 (dd,  $J$  = 5.2, 2.2 Hz, 2H;  $\text{CHCCCH}_2$ -), 3.42 (s, 1H;  $\text{CHCCH}_2$ -), 1.14 (d,  $J$  = 6.1 Hz, 3H;  $\text{CH}_3$ -).  $^{13}\text{C}$  NMR ( $\text{CDCl}_3$ )  $\delta$ =173.1 (CONH), 170.4 (COFc), 87.1 ( $\text{CHCH}_3$ ), 79.61 ( $\text{CHCCCH}_2$ -), 76.9 (C-1, Fc), 72.1 (CHC-), 70.2 (C-2, C-5, Fc), 69.9 ( $\text{Cp}_{\text{unsubst.}}$ ), 68.3 (C-3, C-4, Fc), 60.0 (CH), 29.4 ( $\text{CHCCH}_2$ -), 17.2 ( $\text{CH}_3$ -).

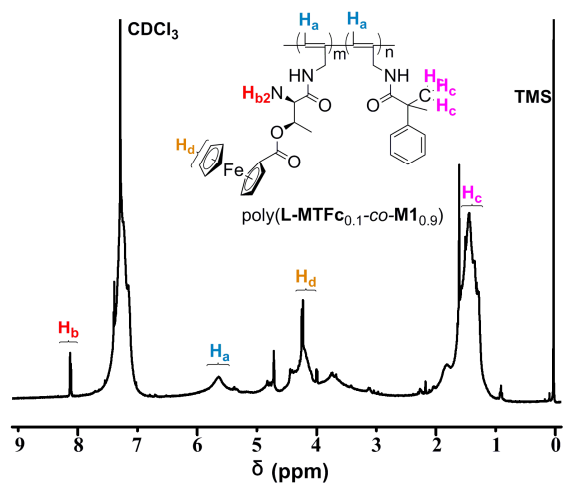

**Figure S9.**  $^1\text{H}$  NMR spectrum of  $\text{poly}(\text{L-MTFc}_{0.1}\text{-co-M1}_{0.9})$ ; measured in  $\text{CDCl}_3$  at  $25^\circ\text{C}$ .

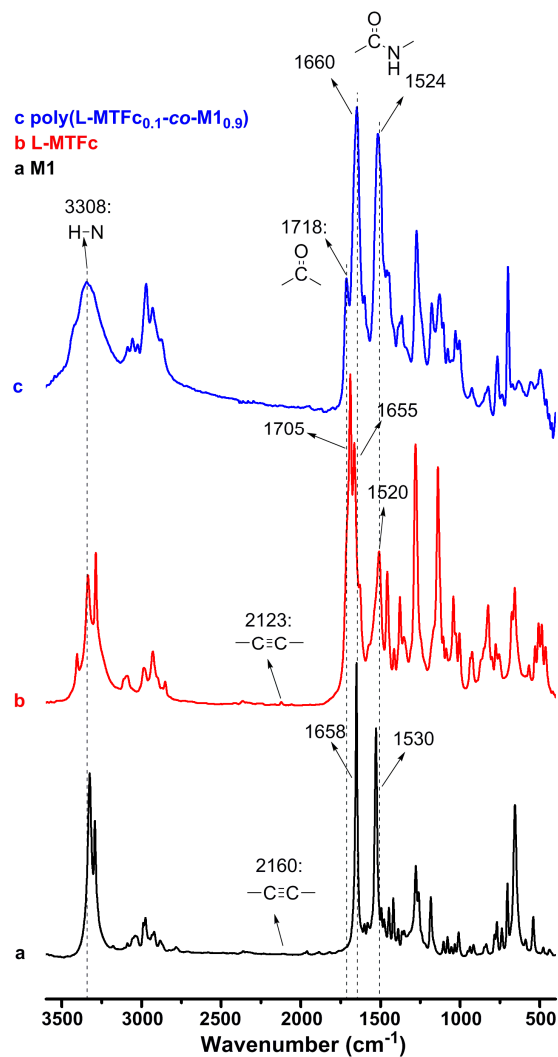

**Figure S10.** Typical FT-IR spectra of (a) **M1**, (b) **L-MTFc** and (c) **poly(L-MTFc<sub>0.1</sub>-co-M1<sub>0.9</sub>)** (in KBr tablet).

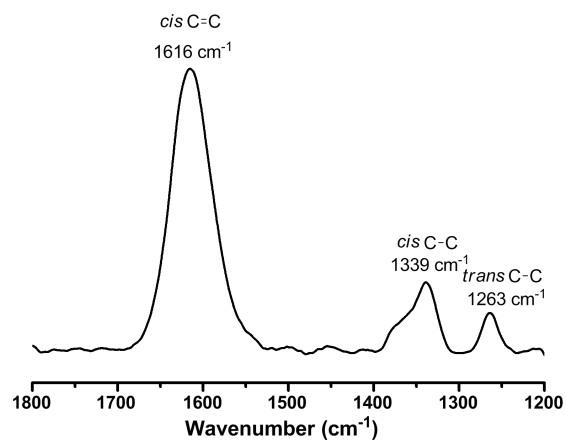

**Figure S11.** Raman spectrum of **poly(L-MTFc<sub>0.1</sub>-co-M1<sub>0.9</sub>)**.

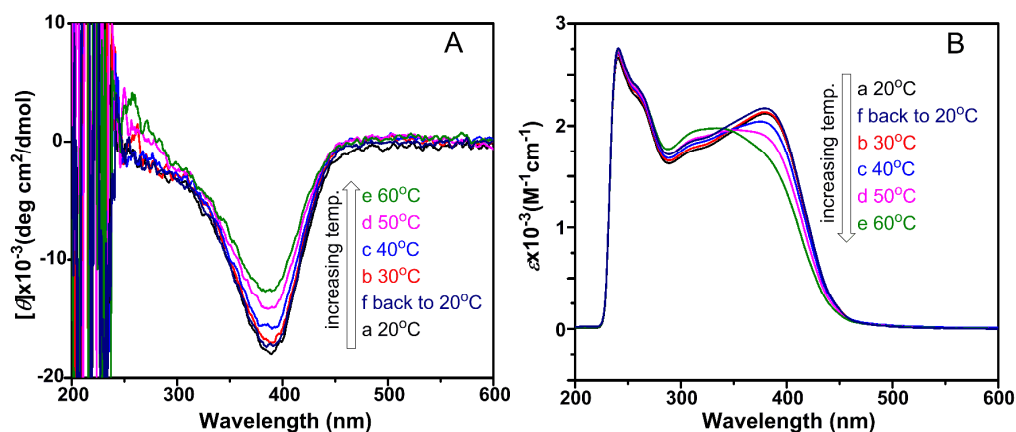

**Figure S12.** (A) CD and (B) UV-vis spectra of poly(**D-MTF**<sub>0.1-co-M1</sub><sub>0.9</sub>) at increasing temperatures (from 20 to 60 °C) in THF ( $c = 1 \times 10^{-3}$  mol/L).

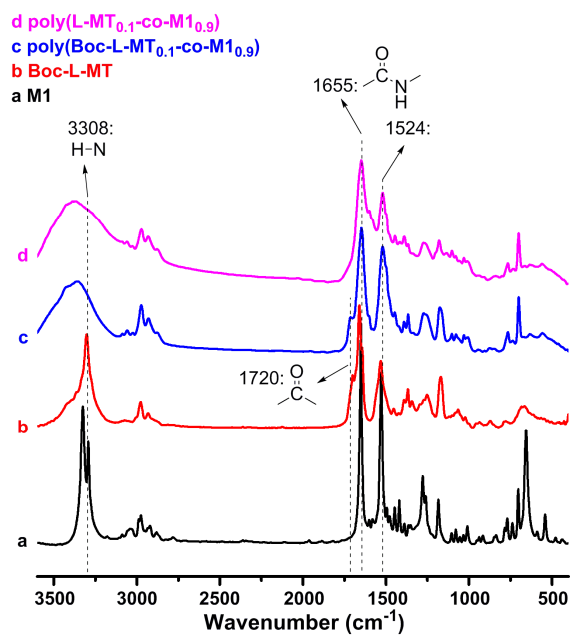

**Figure S13.** Typical FT-IR spectra of (a) **M1**, (b) **Boc-L-MT** and (c) poly(**Boc-L-MT**<sub>0.1-co-M1</sub><sub>0.9</sub>) (d) poly(**L-MT**<sub>0.1-co-M1</sub><sub>0.9</sub>) (in KBr tablet).

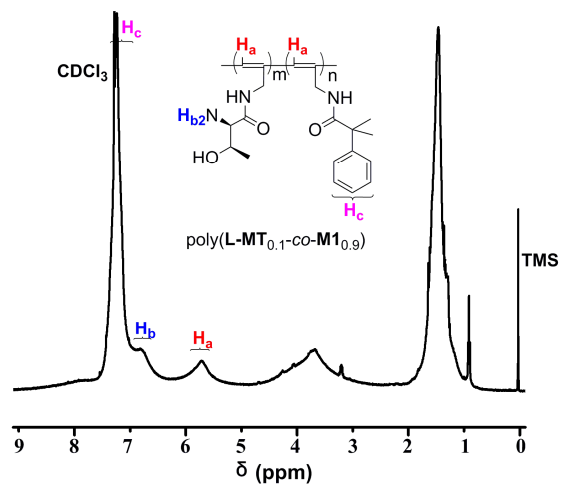

**Figure S14.**  $^1\text{H}$  NMR spectrum of  $\text{poly}(\text{L-MT}_{0.1}\text{-co-M1}_{0.9})$ ; measured in  $\text{CDCl}_3$  at  $25^\circ\text{C}$ .

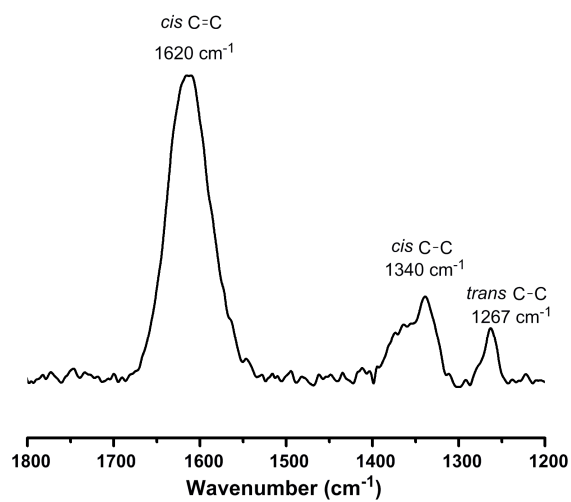

**Figure S15.** Raman spectrum of  $\text{poly}(\text{L-MT}_{0.1}\text{-co-M1}_{0.9})$ .

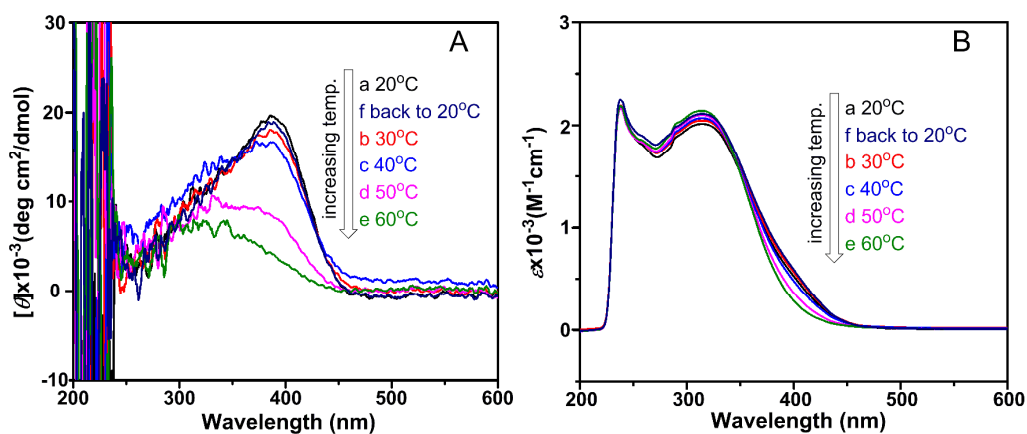

**Figure S16.** (A) CD and (B) UV-vis spectra of poly(**L-MT**<sub>0.1</sub>-*co*-**MI**<sub>0.9</sub>) at increasing temperatures (from 20 to 60 °C) in THF ( $c = 1 \times 10^{-3}$  mol/L).

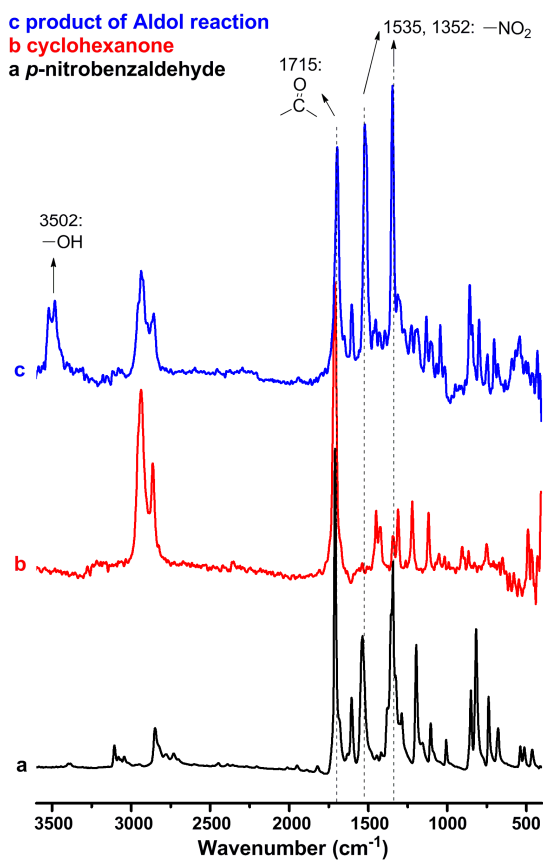

**Figure S17.** FT-IR spectra of the Aldol reaction product (in KBr tablet).

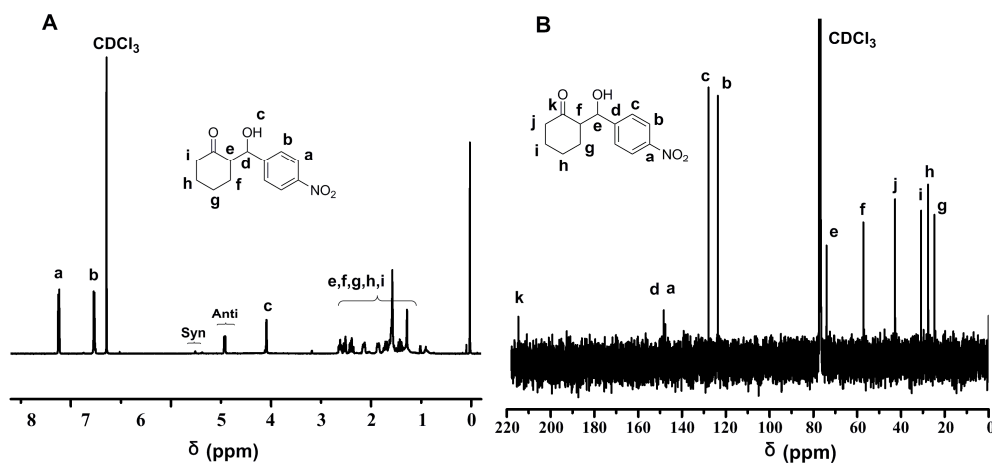

**Figure S18.** (A)  $^1\text{H}$  and (B)  $^{13}\text{C}$  NMR spectra of the Aldol reaction product; measured in  $\text{CDCl}_3$  at 25  $^\circ\text{C}$ .

**(2*S*, 1'*R*)-2-(hydroxyl-(*p*-nitrophenyl) methyl) cyclohexan-1-one:**  $^1\text{H}$  NMR ( $\text{CDCl}_3$ ),  $\delta$  (ppm): 8.20–8.21 (d, 2H,  $J = 8.6$ ), 7.50–7.51 (d, 2H,  $J = 8.6$ ), 4.89–4.91 (dd, 1H,  $J = 8.3$ ,  $J = 3.2$ ), 4.05–4.06 (d, 1H,  $J = 3.2$ ), 2.57–2.61 (m, 1H), 2.48–2.52 (m, 1H), 2.34–2.39 (m, 1H), 2.09–2.14 (m, 1H), 1.82–1.84 (m, 1H), 1.63–1.71 (m, 1H), 1.52–1.61 (m, 2H), 1.35–1.42 (m, 1H).  $^{13}\text{C}$  NMR ( $\text{CDCl}_3$ ),  $\delta$  (ppm): 214.8, 148.4, 147.6, 127.9, 123.6, 74.0, 57.2, 42.7, 30.8, 27.7, 24.7.

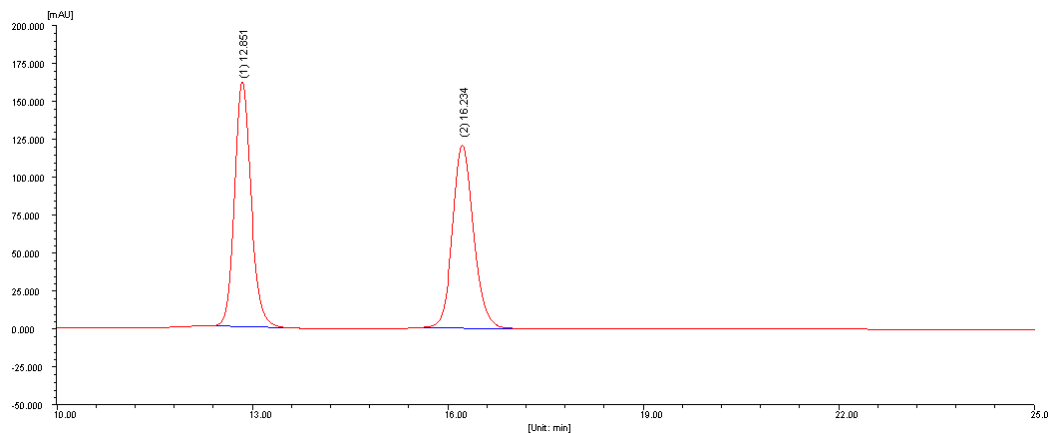

**Figure S19.** Typical HPLC spectrum of the racemic Aldol reaction product.

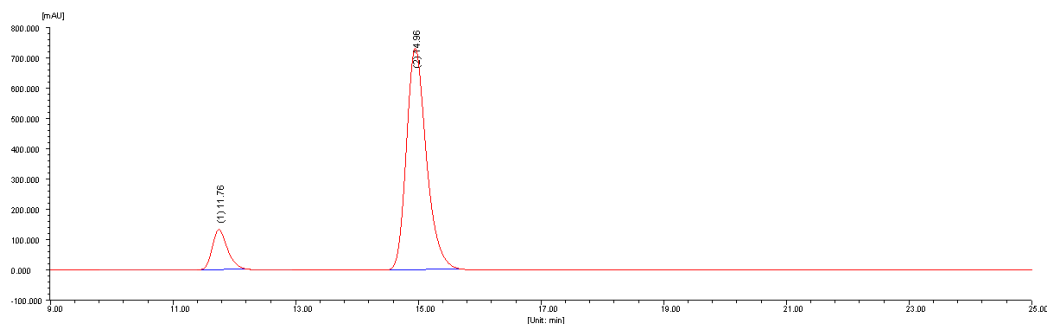

**Figure S20.** Typical HPLC spectrum of the Aldol reaction product catalyzed by poly(L-MT<sub>0.1</sub>-co-M<sub>10.9</sub>).

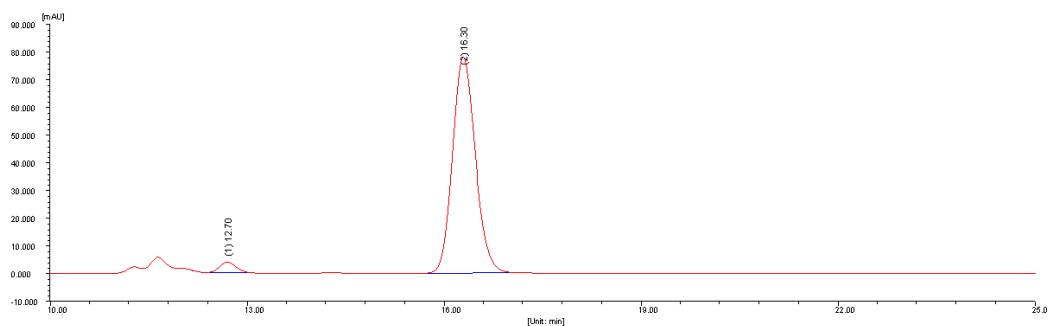

**Figure S21.** Typical HPLC spectrum of the Aldol reaction product catalyzed by poly(L-MTFc<sub>0.1</sub>-co-M<sub>10.9</sub>) in the presence of PhCOOH (0.1 equiv.) and H<sub>2</sub>O (10 equiv.).

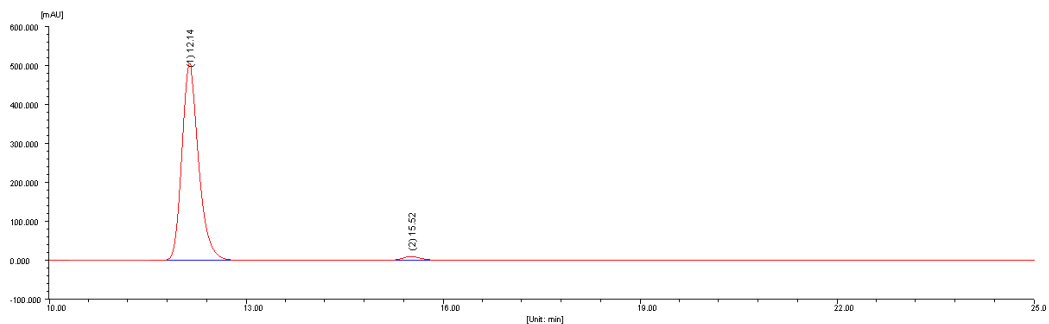

**Figure S22.** Typical HPLC spectrum of the Aldol reaction product catalyzed by poly(D-MTFc<sub>0.1</sub>-co-M<sub>10.9</sub>) in the presence of PhCOOH (0.1 equiv.) and H<sub>2</sub>O (10 equiv.).
